# Supplementary material for: Dynamics and yields for CHBrCl2photodissociation from 215–265 nm
Source: Royal Society of Chemistry journal article supplement (doi:10.1039/c6cp05061a), 2016-01-01
Supplement: c6cp05061a1.pdf [file c6cp05061a1.pdf]

**Supporting Information for Dynamics and Quantum Yields for  $\text{CHBrCl}_2$**

**Photodissociation from 215–265 nm**

Wyatt G. Merrill, F. Fleming Crim, and Amanda S. Case

Department of Chemistry, University of Wisconsin - Madison, Madison, Wisconsin, 53706, USA

**CONTENTS**

|                                                                                                 |              |
|-------------------------------------------------------------------------------------------------|--------------|
| <b>A. Fits for beta parameter at each wavelength for both channels</b>                          | <b>pg. 2</b> |
| <b>B. Wavelength-dependent data for various alkyl halides</b>                                   | <b>pg. 3</b> |
| <b>C. Measured internal energy and modeled rotational energy for <math>\text{CHCl}_2</math></b> | <b>pg. 4</b> |
| <b>D. Geometry optimizations used for impulsive modeling</b>                                    | <b>pg. 5</b> |

A. Fits for beta parameter at each wavelength for both channels

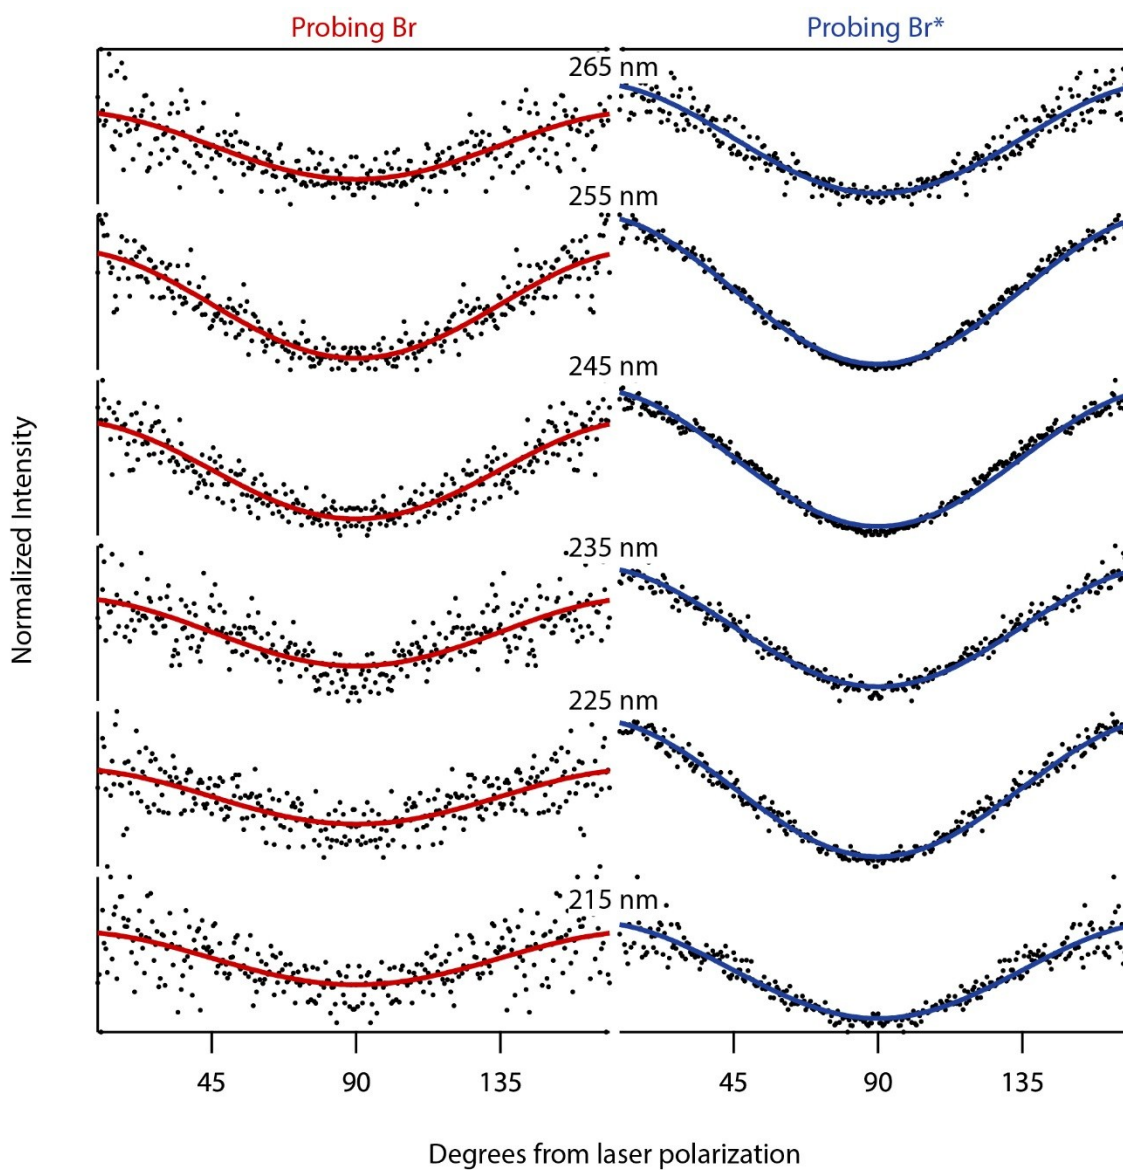

**Figure S1** Angular distributions of intensity from VMI data at most probable translational energy for each photolysis wavelength employed. The vertical axis gives image intensity as a function of the angle away from the electric field polarization of the photolysis laser. All data was fit with equation 6 (red line) and beta parameters were extracted from the individual fits.

## B. Wavelength-dependent data for various alkyl halides

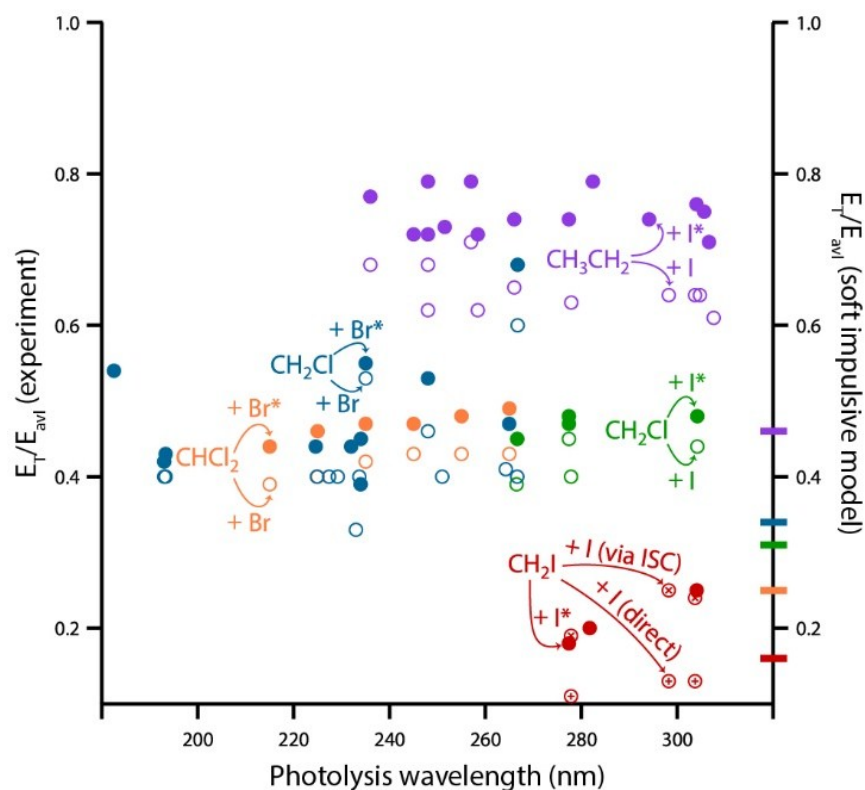

**Figure S2** Wavelength dependence of data averaged for Figure 6. Experimental data taken from various other studies on similar alkyl halides: CH<sub>3</sub>CH<sub>2</sub>I<sup>18,48,61-63</sup> (purple), CH<sub>2</sub>ClBr<sup>25,26,29,33,36</sup> (blue), ICH<sub>2</sub>Cl<sup>31,34</sup> (green), CHCl<sub>2</sub>Br (this work, orange), and CH<sub>2</sub>I<sub>2</sub><sup>28</sup> (red). Open markers denote dissociations leading to spin-excited halogen fragments, and closed markers denote ground-state halogen fragments. Predictions of translational energy partitioning from the soft impulsive model<sup>63</sup> are shown with hash marks on the right-hand vertical axis.

### C. Measured internal energy and modeled rotational energy for $\text{CHCl}_2$

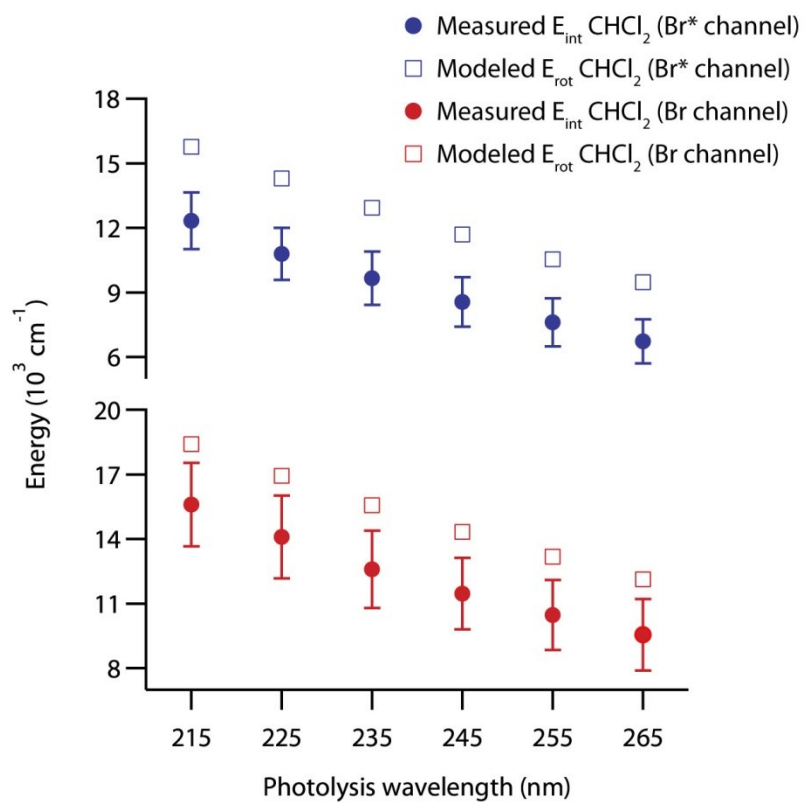

**Figure S3** Wavelength dependence of measured internal energy (closed circles) and modeled rotational energy (open squares). Bars on measured data indicate the full-width, half-maximum spread of the internal energy. Modeled data assumes no vibrational excitation (rigid model).

#### D. Geometry optimizations used for impulsive modeling

The CHBrCl<sub>2</sub> geometry was optimized at the B3LYP level of theory with an aug-cc-pVTZ basis.

The xyz coordinates (in Angstroms) are:

|    |             |             |             |
|----|-------------|-------------|-------------|
| C  | 0.00000000  | 0.00000000  | 0.00000000  |
| H  | 0.90340200  | 0.59060400  | 0.00000000  |
| Cl | 0.00000000  | -1.00026400 | 1.46858200  |
| Cl | 0.00000000  | -1.00026400 | -1.46858200 |
| Br | -1.48869400 | 1.26896000  | 0.00000000  |

The ICH<sub>2</sub>Cl geometry was optimized at the B3LYP level of theory with 6-311++G(3df,3pd) basis for the C, H, and Cl atoms and a LanL2DZ basis for the I atom (as is consistent with Cheng and coworkers). The xyz coordinates (in Angstroms) are:

|    |               |               |               |
|----|---------------|---------------|---------------|
| C  | -1.0516232795 | 0.8916619626  | 0.0000005149  |
| I  | 0.9087821748  | -0.0509807772 | -0.0000013228 |
| H  | -1.0960169952 | 1.4897122106  | -0.8986818834 |
| H  | -1.0960198857 | 1.4897141230  | 0.8986826823  |
| Cl | -2.4021719577 | -0.2511362588 | 0.0000000091  |
